# Supplementary material for: Pleomorphic Xanthoastrocytoma, Anaplastic Pleomorphic Xanthoastrocytoma, and Epithelioid Glioblastoma: Case Series with Clinical Characteristics, Molecular Features and Progression Relationship
Source: Research Square preprint supplement (doi:10.21203/rs.3.rs-99690/v2), 2021-04-20
Supplement: Supplementary file 1 [file 84718af5f675dc3810417e3d.xlsx]

## Sheet: Sheet1
Supplementary Table 2 The molecular features of the E-GBM patient.
	First operation-2010	Second operation-2016	Third operation-2017	Fourth operation-2019
GFAP	Positive	Positive	Positive	Positive
EMA	Negative	Negative	Negative	Negative
MGMT	Promoter Unmethylation	Promoter Unmethylation	Promoter Unmethylation	Promoter Unmethylation
Oligo-2	Positive	Positive	Positive	Positive
IDH1	Wild-type	Wild-type	Wild-type	Wild-type
TP53	Wild-type	Wild-type	Wild-type	Wild-type
BARF V600E	Wild-type	Mutation	Mutation	Mutation
Ki-67	0.1	0.05	0.08	0.35
Neu-N	Unknown	Negative	Positive	Negative
EGFR	Unknown	Positive	Positive	Positive
VEGF	Unknown	Positive	Positive	Negative
ATRX	Unknown	Wild-type	Wild-type	Wild-type
CD34	Unknown	Positive	Positive	Unknown
CD68	Unknown	Positive	Positive	Unknown
Reticular fiber	Unknown	Positive	Positive	Unknown
CIC	Unknown	Unknown	Unknown	Wild-type
FUBP1	Unknown	Unknown	Unknown	Positive
H3K27M	Unknown	Unknown	Unknown	Positive
