# Supplementary material for: Pleomorphic Xanthoastrocytoma, Anaplastic Pleomorphic Xanthoastrocytoma, and Epithelioid Glioblastoma: Case Series with Clinical Characteristics, Molecular Features and Progression Relationship
Source: Research Square preprint supplement (doi:10.21203/rs.3.rs-99690/v2), 2021-04-20
Supplement: Supplementary file 2 [file 95146485e224b61b2581140a.xlsx]

## Sheet: Sheet1
Supplementary Table 1 The histological review of the E-GBM patient.
	First operation-2010	Second operation-2016	Third operation-2017	Fourth operation-2019
Vascular hyperplasia	Y	Y	Y	Y
Hemorrhage	N	N	Y	Y
Necrosis	N	N	N	Y
Collagen fiber hyperplasia	Y	Y	Y	N
Inflammatory cell infiltration	N	Y	N	N
Cell process	N	N	N	Y
Keys: Y=Yes, N=No
