# Supplementary material for: Pleomorphic Xanthoastrocytoma, Anaplastic Pleomorphic Xanthoastrocytoma, and Epithelioid Glioblastoma: Case Series with Clinical Characteristics, Molecular Features and Progression Relationship
Source: Research Square preprint supplement (doi:10.21203/rs.3.rs-99690/v2), 2021-04-20
Supplement: Supplementary file 3 [file 9add6b81bcda231dd346057c.xlsx]

## Sheet: Sheet1
Table 2 The clinical characteristics of the E-GBM arising from A-PXA.
		First operation	Second operation	Third operation	Fourth operation
Age (years)		40	46	47	49
Time		December 7, 2010	December 5, 2016	August 14, 2017	July 17, 2019
Preoperative symptoms	Blood pressure	160/100	125/80	126/81	146/95
	Headache	Y	N	N	N
	Blurred vision	Y	N	N	N
	Decreased vision	Y (Binoculus)	N	N	N
	Visual field defect	Y (Temporal side of the right eye)	Y (Temporal side of the right eye)	Y (Temporal side of the right eye)	Y (Temporal side of the right eye)
	Muscle strength grade	5	3	3	3
	Muscle tone	Normal	Normal	Normal	Normal
	Babinski sign	N	N	N	N
	Headache	N	N	N	N
Postoperative symptoms	Blood pressure	126/78	130/88	110/85	130/86
	Blurred vision	N	N	N	N
	Decreased vision	N	N	N	N
	Visual field defect	Y (Right side of binoculus)	Y (Temporal side of the right eye)	Y (Temporal side of the right eye)	Y (Temporal side of the right eye)
	Muscle strength grade	4	4	4	4
	Muscle tone	Normal	Normal	Normal	Normal
	Babinski sign	N	N	N	Y
Extent of surgical resection		Y	Y	Y	Y
Initial therapy	Depakin	Y	Y	Y	Y
	Metoprolol	Y	Y	Y	Y
	Amlodipine	Y	Y	Y	Y
	Compound sulfamethoxazole	Y	Y	Y	Y
	Rivaroxaban	N	N	Y	N
	Aprepitant	N	N	N	N
	TMZ	N	Y	Y	Y
	Radiotherapy	Y	Y	Y	Y
Keys: Y=Yes, N=No
